# Supplementary material for: TANK prevents IFN-dependent fatal diffuse alveolar hemorrhage by suppressing DNA-cGAS aggregation
Source: Life Sci Alliance. 2021 Nov 24;5(2):e202101067. doi: 10.26508/lsa.202101067 (PMC8616552; doi:10.26508/lsa.202101067)
Supplement: Supplementary file 4 [file LSA-2021-01067_SdataF4.xlsx]

## Sheet: Fig. 4A
	Relative luciferase activity
	WT			Tank
Mock	0.990928	1.31798	0.691096	0.529062	0.688068	0.526378
IRF7 10	2.23474	3.32703	3.59275	3.24416	3.94695	2.69525
IRF7 10+MyD88	5.29923	7.83875	7.69648	4.17867	3.02207	4.3944
IRF7 10+TRAF6	7.8943	23.2673	11.7156	4.01149	3.63991	4.8152
IRF7 10+MyD88+TRAF6	22.1518	16.879	31.396	4.02347	6.87401	3.68776

## Sheet: Fig. 4B
	Ifnb (Relative expression)								Irf7 (Relative expression)
	WT			Tank–/–					WT			Tank–/–
UT	0.834438	0.939581	1.28866	1.71586	1.0592	1.15008		UT	1.10982	1.04872	0.859189	1.07037	1.11019	1.15478
R848	6.13	3.98878	4.97933	56.7273	75.6889	66.0623		R848	7.2584	7.40059	6.69357	11.5567	16.999	15.6454
Poly(U)	27.1534	27.8963	27.4874	136.692	151.381	105.051		Poly(U)	2.36145	1.37554	1.79558	4.18406	4.2182	3.30995
CpGD19	4.81972	5.68523	7.28163	34.1318	17.2878	22.3683		CpGD19	2.70357	1.77666	2.05053	6.48182	5.34674	4.22383

## Sheet: Fig. 4C
	Ifnb (Relative expression)								Isg15 (Relative expression)								Cxcl10 (Relative expression)
	WT			Tank–/–					WT			Tank–/–					WT			Tank–/–
UT	0.850297	1.2153	0.968256	1.39523	1.14711	1.67073		UT	1.10065	0.950611	0.955759	1.57935	1.79037	1.65132		UT	1.12838	0.842692	1.05166	0.997409	0.531889	1.07489
ISD 0.4 ug/ml	44.8393	37.49	42.0536	75.8	81.0602	71.3369		ISD 0.4 ug/ml	0.935349	0.781897	0.849833	1.00937	0.761297	0.621333		ISD 0.4 ug/ml	4.12174	2.82689	3.09732	5.75123	6.56033	7.19533
ISD 2.0 ug/ml	106.175	133.644	109.566	193.505	235.419	259.251		ISD 2.0 ug/ml	1.27791	1.07635	0.986238	1.39908	1.55644	1.75172		ISD 2.0 ug/ml	7.31281	8.26054	7.89673	14.8286	15.5279	14.5094
HSV-60 0.4 ug/ml	118.79	105.848	142.165	369.891	263.684	393.095		HSV-60 0.4 ug/ml	1.41055	1.30771	1.28003	2.79315	2.70181	2.35203		HSV-60 0.4 ug/ml	3.82903	4.04928	3.39278	9.74572	11.1109	9.79054
HSV-60 2.0 ug/ml	127.199	103.318	135.576	349.42	331.008	269.628		HSV-60 2.0 ug/ml	2.53598	3.02765	3.14918	3.79489	4.78518	3.59139		HSV-60 2.0 ug/ml	20.6622	20.2092	24.224	87.4998	70.1667	58.7003
HT-DNA 0.4 ug/ml	64.2002	70.1825	66.657	635.382	518.523	758.978		HT-DNA 0.4 ug/ml	3.18705	2.22214	1.54486	9.27741	8.46599	8.85794		HT-DNA 0.4 ug/ml	3.72952	3.36031	5.35679	4.79164	6.03709	5.82313
HT-DNA 2.0 ug/ml	497.272	356.619	384.922	704.402	772.156	651.492		HT-DNA 2.0 ug/ml	6.24936	4.35252	6.34594	15.5034	14.2841	14.5676		HT-DNA 2.0 ug/ml	31.815	28.8155	22.7933	51.7466	39.9183	46.0064
poly (I:C) 0.1 ug/ml	245.611	252.21	363.971	449.674	485.194	340.228		poly (I:C) 0.1 ug/ml	66.3226	68.2455	62.8246	69.4837	53.8889	45.4751		poly (I:C) 0.1 ug/ml	3.22767	2.80126	4.42829	8.31897	7.58907	5.92084
poly (I:C) 0.5 ug/ml	529.131	453.455	730.736	659.862	712.622	664.519		poly (I:C) 0.5 ug/ml	109.753	118.822	113.736	137.428	135.275	122.94		poly (I:C) 0.5 ug/ml	678.604	565.981	493.287	973.604	643.468	571.34
