# Supplementary material for: TANK prevents IFN-dependent fatal diffuse alveolar hemorrhage by suppressing DNA-cGAS aggregation
Source: Life Sci Alliance. 2021 Nov 24;5(2):e202101067. doi: 10.26508/lsa.202101067 (PMC8616552; doi:10.26508/lsa.202101067)
Supplement: Supplementary file 6 [file LSA-2021-01067_SdataF6.1.xlsx]

## Sheet: Fig. 6A
	Ifnb (Relative expression)
	WT			Tank–/–
NDV	102.75	154.481	145.226	40.643	106.724	93.4811
VACV	215.234	237.824	411.119	733.74	804.439	794.202
	Isg15 (Relative expression)
	WT			Tank–/–
NDV	302.662	273.941	322.977	296.895	442.59	350.451
VACV	75.9891	89.6321	136.245	415.803	385.644	405.171
	Cxcl10 (Relative expression)
	WT			Tank–/–
NDV	482.892	460.452	493.93	543.43	946.572	737.924
VACV	31.7626	42.0261	48.251	94.7739	118.772	94.6968

## Sheet: Fig. 6B
	Ifnb (Relative expression)
	WT			Tank–/–
ABT737+z-VAD	215.234	237.824	411.119	733.74	804.439	794.202
	Cxcl10 (Relative expression)
	WT			Tank–/–
ABT737+z-VAD	1060.75	1313.57	1054.65	1630.4	2022.57	2157.4

## Sheet: Fig. 6D
	Ifnb (Relative expression)
	WT			Tank–/–
dsDNA	906.853	1022.82	810.347	4205.4	2511.11	3110.64
cGAMP	508.747	603.502	588.534	469.953	444.649	724.445
	Isg15 (Relative expression)
	WT			Tank–/–
dsDNA	210.6	194.729	160.156	427.922	399.776	417.877
cGAMP	116.846	185.554	165.561	116.677	133.443	197.808
	Cxcl10 (Relative expression)
	WT			Tank–/–
dsDNA	5633.18	4994.36	4613.08	13949.9	10805.5	12080.8
cGAMP	9052.23	8325.97	9847.58	6378.97	7277.9	9931.57

## Sheet: Fig. 6E
	Ifnb (Relative expression)
	WT			Tank–/–
DMXAA	9531.14	8534.97	8745.55	7827.91	7168.73	12405.2
	Isg15 (Relative expression)
	WT			Tank–/–
DMXAA	81.4646	71.4087	62.1142	51.3079	61.8323	74.7179
